# Supplementary material
Source: PubMed Central journal article supplement (PMC3368822)
Supplement: epi-7-400-s02.pdf [file epi-7-400-s02.pdf]

**Supplemental Material to:**

Mahoney SE, Yao Z, Keyes CC, Tapscott SJ, Diede SJ.  
*Genome-wide DNA methylation studies suggest distinct DNA methylation patterns in pediatric embryonal and alveolar rhabdomyosarcomas*  
Epigenetics 2012; 7(4); <http://dx.doi.org/10.4161/epi.7.4.19463>

<http://www.landesbioscience.com/journals/epigenetics/article/19463/>

Included in this file: Figures S1 and S2

Table S1 (xls) should be downloaded separately.

<http://www.landesbioscience.com/journals/epigenetics/2011EPI0283R-Table%20S1.xlsx>

Supplemental Table 1. DAMD-positive loci in the RMS cell lines and patient samples. Columns are denoted with a '1' if the locus was found to be DAMD-positive and a '0' if it was not for each of the RMS patient samples and cell lines. The column labeled as Combined\_score shows how many samples were DAMD-positive for the given locus.

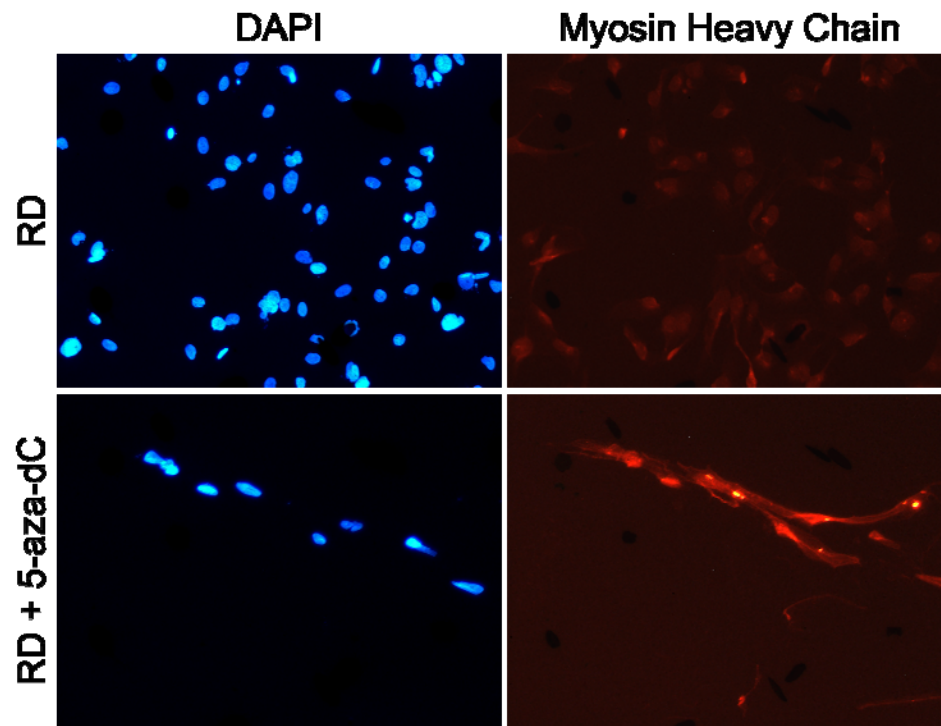

**Supplemental Figure 1.** Differentiation of RD cells by 5-aza-dC treatment. Untreated and 5-aza-dC treated RD cells were stained with DAPI (blue) or an antibody to myosin heavy chain (red).

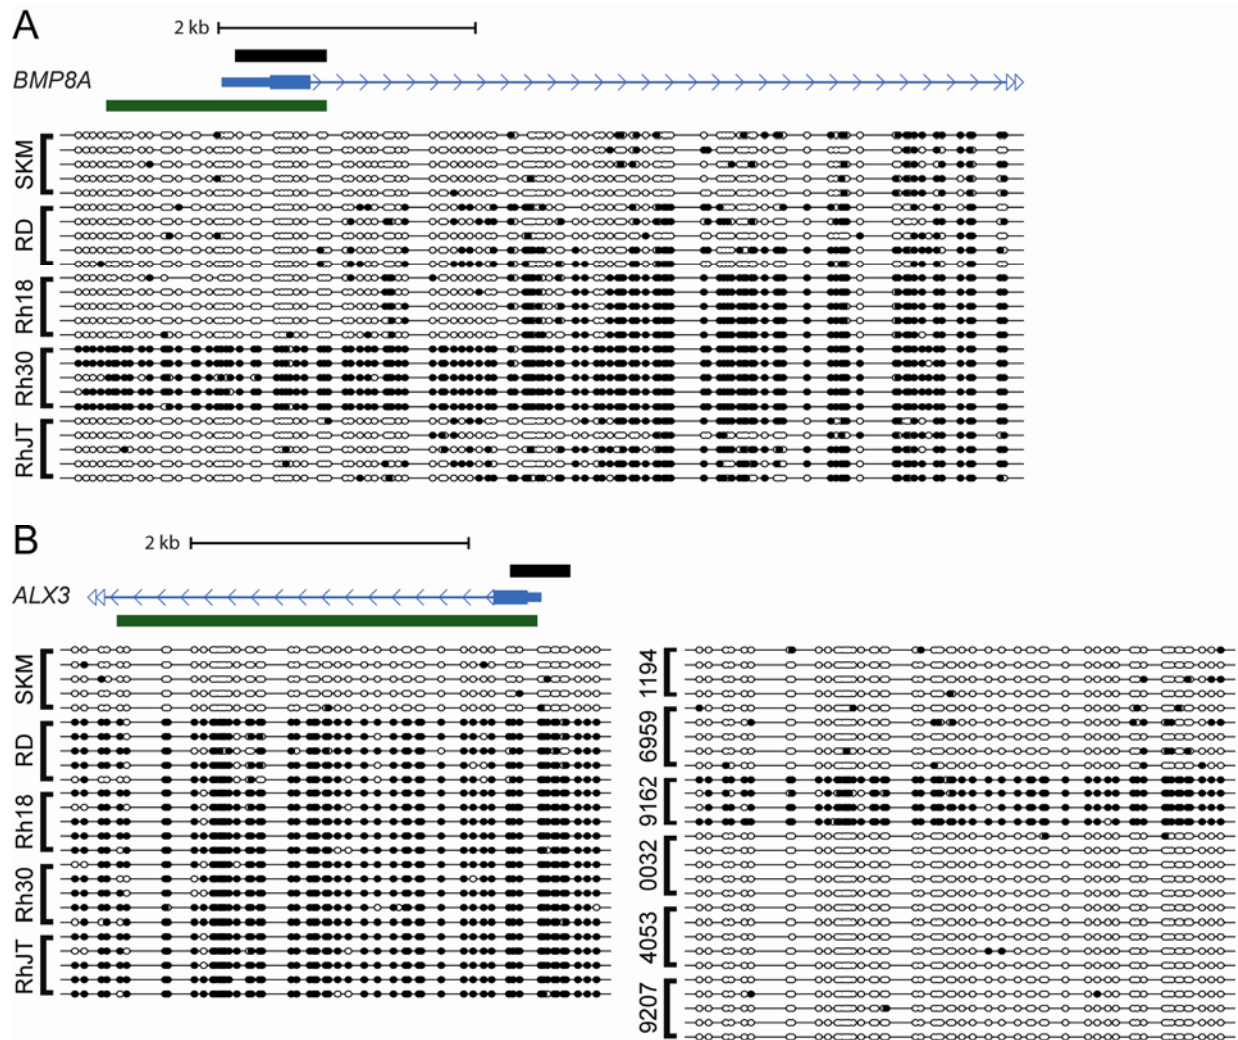

**Supplemental Figure 2.** Bisulfite sequence analysis of *BMP8A* and *ALX3*. (A,B) Bisulfite sequence analysis from the rhabdomyosarcoma cell lines (RD, Rh18, RhJT, and Rh30) and normal skeletal muscle (SKM). Bisulfite sequence analysis of RMS patient samples is also shown for *ALX3*.
